# Supplementary material for: Association Between Harvesting at Least 15 Lymph Nodes and Survival in Resected Pancreatic Cancer Using a Nationwide Database
Source: Research Square preprint supplement (doi:10.21203/rs.3.rs-8496148/v1), 2026-01-13
Supplement: Supplementary file 1 [file 7c9c8c52d09e382f7817aa07.docx]

**Table 1.** Baseline characteristic of the resected pancreatic cancer patient, n=926

|  | **N** | **%** |
| --- | --- | --- |
| **Overall** | **926** | **100.00** |
| **Age, years** |  |  |
| Median (Q1-Q3) | 64 (57-72) |  |
| <65 | 470 | 50.76 |
| ≧65 | 456 | 49.24 |
| **Sex** |  |  |
| Male | 517 | 55.83 |
| Female | 409 | 44.17 |
| **Diagnosed year** |  |  |
| 2013 | 48 | 5.18 |
| 2014 | 79 | 8.53 |
| 2015 | 129 | 13.93 |
| 2016 | 113 | 12.20 |
| 2017 | 179 | 19.33 |
| 2018 | 178 | 19.22 |
| 2019 | 200 | 21.60 |
| **Location** |  |  |
| Head | 709 | 76.57 |
| Body | 77 | 8.32 |
| Tail | 77 | 8.32 |
| Others | 63 | 6.80 |
| **Grade** |  |  |
| Well | 77 | 8.32 |
| Moderately | 650 | 70.19 |
| Poorly | 156 | 16.85 |
| Not stated | 43 | 4.64 |
| **Operation** |  |  |
| Pacreatoduodenectomy | 742 | 80.13 |
| Distal pancreatectomy | 142 | 15.33 |
| Total pancreatectomy/ Other | 42 | 4.54 |
| **LN removed number** |  |  |
| Median (Q1-Q3) | 15 (9-22) |  |
| <15 | 430 | 46.44 |
| ≧15 | 496 | 53.56 |
| **LN removed number (positive)** |  |  |
| Median (Q1-Q3) | 1 (0-3) |  |
| **LNR group** |  |  |
| 0-0.25 | 751 | 81.10 |
| 0.26-0.50 | 134 | 14.47 |
| 0.56-0.75 | 34 | 3.67 |
| 0.76-1.00 | 7 | 0.76 |
| **Mortalitya** | 755 | 81.53 |
| **Time to death, years** |  |  |
| Median (Q1-Q3) | 1.30 (0.79-1.96) |  |

1. End of follow-up date was 2021.12.31

Follow-up duration, years
